# Supplementary material for: Space-based observations of fire NO x emission coefficients: a global biome-scale comparison
Source: Copernicus journal article supplement (doi:10.5194/acp-14-2509-2014), 2014-03-11
Supplement: Supplementary file 1 [file supplement_table.xlsx]

## Sheet: Forests
Region	Type	EC (g MJ-1)	SE (g MJ-1)	N	R2	p<0.05
A	Tropical	0.357	0.058	366	0.1934
B	Tropical	0.179	0.035	351	0.20682	=0.0096
C	Tropical	0.333	0.055	653	0.10006
D	Tropical	0.341	0.061	402	0.22552
E	Tropical	0.36	0.051	3493	0.30663
	Temperate	0.326	0.03	778	0.35158
F	Tropical	0.374	0.046	579	0.36179
	Temperate	0.285	0.028	1147	0.21391
G	Temperate	0.8	0.18	320	0.25328	<0.0004
H	Temperate	0.298	0.072	336	0.35797
I	Temperate	0.34	0.15	129	0.48988
J	Temperate	0.275	0.056	257	0.43974
	Boreal	0.24	0.035	776	0.46491
K	Boreal	0.48	0.078	740	0.22112	=0.0028
Biome means:	Tropical	0.356	0.044	6266	0.307
	Temperate	0.298	0.019	3417	0.293
	Boreal	0.25	0.033	1633	0.308
Note: for all tables, the column "p<0.05" provides p values measured
for all ecoregions with ECs that are significantly different than the
mean biome EC at the p<0.05 level. The p value is estimated using a
nonparametric boostrap technique where the ecoregion and mean
biome slope are resampled with replacement and the difference is
recorded; there are 5000 resamples and p is calculated directly from
the distribution of the differences in slope.

## Sheet: Grasslands
Region	EC (g MJ-1)	SE (g MJ-1)	N	R2	p<0.05
L	0.597	0.075	633	0.25715	=0.0012
M	0.404	0.016	22747	0.27148
N	0.397	0.019	26944	0.25965
O	0.353	0.031	10698	0.28648
P	0.85	0.16	313	0.259	=0.0004
Q	0.401	0.022	5110	0.51019
R	0.263	0.029	814	0.28331	=0.014
S	0.291	0.062	176	0.12334
T	0.277	0.045	748	0.21468
U	0.291	0.047	375	0.17791
V	0.43	0.13	175	0.20012
W	0.45	0.065	310	0.4515
X	0.258	0.031	109	0.5706	=0.0272
Y	0.187	0.018	280	0.65667	<0.0004
Z	0.717	0.06	1884	0.52693	<0.0004
AA	0.433	0.059	286	0.41711
BB	0.444	0.064	200	0.40368
Biome mean:	0.362	0.015	73789	0.29

## Sheet: Shrublands
Region	EC (g MJ-1)	SE (g MJ-1)	N	R2	p<0.05
CC	0.246	0.038	2944	0.39012
DD	0.42	0.056	506	0.55683	=0.0088
EE	0.277	0.049	307	0.65706
FF	0.365	0.046	183	0.58315
GG	0.33	0.066	440	0.28704
Biome mean:	0.275	0.03	4764	0.439

## Sheet: Crops
Region	EC (g MJ-1)	SE (g MJ-1)	N	R2	p<0.05
HH	0.293	0.051	425	0.23673
II	0.29	0.12	224	0.085088
JJ	0.24	0.1	111	0.11449
KK	0.07	0.15	108	0.0012391
LL	0.39	0.17	154	0.1146
MM	0.176	0.059	314	0.050186
NN	0.12	0.038	101	0.13056	=0.006
OO	0.212	0.095	233	0.064743
PP	0.356	0.042	2214	0.081115
Biome mean:	0.266	0.024	4732	0.068
